1

2 **Full title: Antagonistic paralogs control a switch between growth and pathogen**

3 **resistance in *C. elegans***

4

5 **Short title: A switch for *C. elegans* resistance to diverse natural pathogens**

6

7 Kirthi C. Reddy\*, Tal Dror\*, Ryan S. Underwood\*, Guled A. Osman#, Christopher A.

8 Desjardins^, Christina A. Cuomo^, Michalis Barkoulas#, and Emily R. Troemel\*

9

10 \*Division of Biological Sciences, University of California, San Diego, La Jolla, CA 92093

11 USA

12 ^Infectious Disease and Microbiome Program, Broad Institute, Cambridge MA 02142

13 USA

14 # Department of Life Sciences, Imperial College, London SW7 2AZ, UK

15 Lead contact: Emily Troemel, 9500 Gilman Dr #0349, La Jolla, CA 92093, USA

16 [etroemel@ucsd.edu](mailto:etroemel@ucsd.edu)

17

18

19 **Abstract**

20 Immune genes are under intense pressure from pathogens, which cause these genes to  
21 diversify over evolutionary time and become species-specific. Through a forward genetic  
22 screen we recently described a *C. elegans*-specific gene called *pals-22* to be a repressor  
23 of “Intracellular Pathogen Response” or IPR genes. Here we describe *pals-25*, which,  
24 like *pals-22*, is a species-specific gene of unknown biochemical function. We identified  
25 *pals-25* in a screen for suppression of *pals-22* mutant phenotypes and found that  
26 mutations in *pals-25* suppress all known phenotypes caused by mutations in *pals-22*.  
27 These phenotypes include increased IPR gene expression, thermotolerance, and  
28 immunity against natural pathogens. Mutations in *pals-25* also reverse the reduced  
29 lifespan and slowed growth of *pals-22* mutants. Transcriptome analysis indicates that  
30 *pals-22* and *pals-25* control expression of genes induced not only by natural pathogens  
31 of the intestine, but also by natural pathogens of the epidermis. Indeed, in an  
32 independent forward genetic screen we identified *pals-22* as a repressor and *pals-25* as  
33 an activator of epidermal defense gene expression. These phenotypic and evolutionary  
34 features of *pals-22* and *pals-25* are strikingly similar to species-specific R gene pairs in  
35 plants that control immunity against co-evolved pathogens.

36

37

38 **Introduction**

39 Evolutionarily ancient genes control core processes in diverse organisms. For example,  
40 the >500 million-year-old Hox gene cluster is required for establishing body plan polarity  
41 in animals as diverse as worms, flies and humans [1]. However, evolutionarily young  
42 genes can also play key roles in development. For example, the *Drosophila* Umbrea  
43 gene only evolved within the *Drosophila* lineage in the last 15 million years but is

44 essential for chromosome segregation in *Drosophila melanogaster* [2]. In general, the  
45 functions of evolutionarily young genes are less well understood than the function of  
46 evolutionarily ancient genes.

47

48 New genes can arise through gene duplication and diversification [3]. Extensive gene  
49 duplication can lead to large, expanded gene families, which appear 'species-specific' if  
50 there is significant diversification away from the ancestral gene. The function of species-  
51 specific genes can provide insight into the pressures imposed upon organisms in their  
52 recent evolutionary past. Pathogen infection imposes some of the strongest selective  
53 pressure on organisms, and accordingly, many species-specific, expanded gene families  
54 are involved in immunity. One example is the family of mouse Naip genes, which encode  
55 sensor proteins in the inflammasome that detect bacteria to trigger cytokine release and  
56 cell death [4]. Another example is the plant R genes, which detect virulence factors from  
57 co-evolved pathogens to activate effector-triggered immunity [5]. Interestingly, a growing  
58 theme in plant R genes is that they can function as opposing gene pairs, with one R  
59 gene promoting host defense and the other R gene inhibiting host defense. Of note, both  
60 the Naip and R genes were identified through unbiased forward genetic screens for  
61 immune genes.

62

63 Recently, we described a forward genetic screen in *C. elegans* for genes that regulate  
64 the transcriptional response to natural intracellular pathogens [6]. From this screen we  
65 identified a *C. elegans*-specific gene called *pals-22* that regulates expression of  
66 Intracellular Pathogen Response or IPR genes. Interestingly, we found that *pals-22* also  
67 regulates proteostasis, potentially through ubiquitin ligase activity (see below). The 'pals'  
68 signature stands for protein containing ALS2CR12 signature, which is found in the single

69 *pals* gene in humans called ALS2CR12. A genome-wide association study implicated  
70 ALS2CR12 in amyotrophic lateral sclerosis (ALS) [7], although this gene has no known  
71 role in ALS, and its biological function is unknown. The *pals* gene family has only a  
72 single member each in the mouse and human genomes, but is substantially expanded in  
73 *Caenorhabditis* genomes: *C. elegans* has 39 *pals* genes; *C. remanei* has 18 *pals* genes;  
74 *C. brenneri* has 8 *pals* genes; and *C. briggsae* has 8 *pals* genes [8].

75

76 *pals-22* mutants have several striking phenotypes in *C. elegans*. First, *pals-22* mutants  
77 have constitutive expression of several IPR genes including the cullin gene *cul-6*, which  
78 is predicted to encode a component of a Cullin-Ring Ligase complex. Second, *pals-22*  
79 mutants have increased tolerance of proteotoxic stressors, and this increased tolerance  
80 requires the wild-type function of *cul-6*. Third, *pals-22* mutants have less robust health in  
81 the absence of stressors. In particular, they have slowed development and shorter  
82 lifespans compared to wild-type animals. Fourth, as shown by another group who  
83 identified *pals-22* in an independent forward genetic screen, *pals-22* mutants have  
84 increased transgene silencing, and increased RNA interference (RNAi) against  
85 exogenous RNA [8]. Thus, loss-of-function mutations in *pals-22* appear to broadly  
86 reprogram the physiology of *C. elegans*.

87

88 Here we describe a forward genetic screen for suppressors of *pals-22* and identify  
89 another *pals* gene called *pals-25*. Interestingly, although it appears that *pals-25* and  
90 *pals-22* are in an operon together, these two genes function antagonistically and direct  
91 opposing phenotypes. We show that mutations in *pals-25* strongly suppress all the  
92 physiological phenotypes seen in *pals-22* mutants, including IPR gene expression,  
93 stress resistance, lifespan, development and transgene silencing. Furthermore, we find

94 that *pals-22* mutants have increased resistance against natural intracellular pathogens,  
95 like the microsporidian species *Nematocida parisii* and the Orsay virus. This increased  
96 resistance is suppressed by mutations in *pals-25*. Also, we use RNA-seq analysis to  
97 show that the *pals-22/pals-25* gene pair (hereafter referred to as *pals-22/25*) regulate  
98 expression of a majority of the genes induced by natural pathogens of the intestine and  
99 find that most of these genes are also induced by blockade of the proteasome.  
100 Interestingly, we observe that *pals-22* and *pals-25* also regulate expression of genes  
101 induced by natural eukaryotic pathogens infecting through the epidermis. Indeed, in an  
102 independent forward genetic screen to find regulators of epidermal defense gene  
103 expression we identified additional mutant alleles of *pals-22* and *pals-25*. In summary,  
104 the species-specific *pals-22/25* gene pair control an entire physiological program that  
105 balances growth with increased proteostasis capacity and resistance against diverse  
106 natural pathogens.

107

## 108 **Results**

### 109 ***pals-25* is required for increased IPR gene expression in *pals-22* mutants**

110 Previously we found that wild-type *pals-22* represses expression of IPR genes: *pals-22*  
111 mutants have constitutive expression of several IPR genes including *pals-5* [6]. A  
112 transcriptional reporter consisting of the 1273 bp upstream region of *pals-5* fused to  
113 GFP, *pals-5p::GFP*, is a reliable marker of IPR gene expression [9] and exhibits strong  
114 GFP expression in a *pals-22* mutant background [6] (Fig 1A-C). To find positive  
115 regulators of IPR gene expression, we mutagenized *pals-22*; *pals-5p::GFP* strains and  
116 screened for loss of GFP expression in F2 animals. From one screen in the *pals-22(jy1)*  
117 mutant background and one screen in the *pals-22(jy3)* mutant background we screened  
118 a total of ~23,000 haploid genomes and found eight independent mutant alleles that

119 almost entirely reverse the increased *pals-5p::GFP* expression back to wild-type levels in  
120 *pals-22* mutants (Fig 1A-F). All of these alleles are recessive, segregate in Mendelian  
121 ratios, and fail to complement each other. These results suggest they all have loss-of-  
122 function mutations in the same gene.

123

124 **Fig 1. *pals-25* is required for increased *pals-5p::GFP* expression in *pals-22***  
125 **mutants.**

126 (A-E) Mutants isolated from *pals-22* suppressor screens show decreased expression of  
127 the *pals-5p::GFP* reporter. Shown are (A) wild-type, (B) *pals-22(jy1)*, (C) *pals-22(jy3)*, (D)  
128 *pals-22(jy1) pals-25(jy11)*, and (E) *pals-22(jy3) pals-25(jy9)* animals. Green is *pals-*  
129 *5p::GFP*, red is *myo-2p::mCherry* expression in the pharynx as a marker for presence of  
130 the transgene. Images are overlays of green, red and Nomarski channels and were  
131 taken with the same camera exposure for all. Scale bar, 100  $\mu\text{m}$ . (F) *pals-5p::GFP*  
132 expression quantified in *pals-22* suppressor mutants using a COPAS Biosort machine to  
133 measure the mean GFP signal and length of individual animals, indicated by green dots.  
134 Mean signal of the population is indicated by black bars, with error bars as SD. Graph is  
135 a compilation of three independent replicates, with at least 100 animals analyzed in each  
136 replicate. \*\*\*  $p < 0.001$  with Student's t-test. (G) *pals-22* and *pals-25* gene coding  
137 structure (UTR not shown), with blue exons for *pals-22* and red exons for *pals-25*. See  
138 S1 Table for residues altered. (H) *pals-5p::GFP* expression in animals treated with either  
139 L4440 RNAi control or *pals-25* RNAi, quantified using a COPAS Biosort machine to  
140 measure the mean GFP signal and length of animals. Parameters the same as in (F).  
141  
142 We used whole-genome sequencing of two mutant strains (*jy9* and *jy100*) to identify the  
143 causative alleles [10] and found predicted loss of function mutations in *pals-25* in both

144 strains. Further sequencing identified *pals-25* mutations in the remaining six mutant  
145 strains (Fig 1G, S1 Table). *pals-25* appears to be in an operon just downstream of *pals-*  
146 *22*, and while these two genes are paralogs, they share limited sequence similarity, with  
147 no significant similarity on the DNA level and only 19.4% identity on the amino acid level.  
148 Of note, neither *pals-22* nor *pals-25* have obvious orthologs in other *Caenorhabditis*  
149 species, and thus appear to be specific to *C. elegans* [8]. To further confirm that *pals-25*  
150 regulates *pals-5p::GFP* gene expression in *pals-22* mutants, we performed RNAi against  
151 *pals-25* in a *pals-22; pals-5p::GFP* strain. As expected, we found lowered expression of  
152 *pals-5p::GFP* (Fig 1H, S2 Fig), indicating that wild-type *pals-25* is required for the  
153 increased expression of *pals-5p::GFP* seen in a *pals-22* mutant background.

154  
155 These observations suggest that *pals-25* acts downstream of *pals-22* to activate mRNA  
156 expression of IPR genes. To test this hypothesis, we used qRT-PCR to measure levels  
157 of endogenous mRNA in *pals-22 pals-25* mutants compared to *pals-22* mutants and  
158 wild-type animals (Fig 2A). We analyzed mRNA levels of *pals-5*, as well as seven other  
159 IPR genes including nematode-specific genes of unknown function (F26F2.1, F26F2.3,  
160 and F26F2.4), and predicted ubiquitin ligase components *skr-3*, *skr-4*, *skr-5* and *cul-6*.  
161 Here we found that mutations in *pals-25* reverse the elevated mRNA levels of all eight of  
162 these IPR genes in a *pals-22* mutant background back to near wild-type levels.

163 Importantly, a non-IPR gene, *skr-1*, is not affected by mutations in *pals-22* or *pals-25*.  
164 These results indicate that in a *pals-22* mutant background, wild-type *pals-25* activates  
165 IPR gene expression.

166

167 **Fig 2. *pals-25* is required for increased IPR gene expression in *pals-22* mutants,**  
168 **but not for IPR induction in response to infection or proteasome inhibition.**

169 (A) qRT-PCR measurement of gene expression in *pals-22* and *pals-22 pals-25* animals,  
170 shown as the fold change relative to wild-type control. (B-C) qRT-PCR measurement of  
171 IPR gene expression in *pals-22(jy3)* and *pals-22(jy3) pals-25(jy9)* animals following 4  
172 hours of infection with *N. parisii* (B) or treatment with the proteasome inhibitor  
173 bortezomib (C). For (A-C), results shown are the average of two independent biological  
174 replicates and error bars are SD. \*  $p < 0.05$  with Student's t-test.

175

176 Previous analysis indicated that *pals-22* is broadly expressed in several tissues in the  
177 animal, including the intestine and the epidermis [6, 8]. Similarly, we found that *pals-25* is  
178 broadly expressed. Using a fosmid containing *pals-25* with endogenous *cis* regulatory  
179 control and tagged at the C terminus with GFP and 3xFLAG [11], we observed PALS-  
180 25::GFP expression throughout the animal, including expression in the neurons,  
181 epidermis, and intestine (S2B Fig). We did not see any change in PALS-25::GFP  
182 expression after *pals-22* RNAi treatment (S2C Fig).

183

#### 184 **IPR genes are induced by infection and by proteasome blockade in *pals-22 pals-*** 185 ***25* mutants**

186 As *pals-25* is required to activate IPR gene expression in a *pals-22* mutant background,  
187 we wondered whether *pals-25* was required for inducing IPR gene expression in  
188 response to external triggers. We originally identified IPR genes because of their  
189 induction by *N. parisii* infection [6, 9], which is an intracellular pathogen in the  
190 Microsporidia phylum that invades and undergoes its entire replicative life cycle inside *C.*  
191 *elegans* intestinal cells [12]. We therefore infected animals with *N. parisii* and compared  
192 induction of IPR genes in *pals-22 pals-25* mutants and wild-type animals at 4 hours (Fig  
193 2B). Here we found similar levels of IPR gene induction in *pals-22 pals-25* and wild-type



194 animals, suggesting that *pals-22/25* regulate expression of IPR genes in parallel to  
195 infection. Next, we examined the role of *pals-22/25* in the transcriptional response to  
196 proteasome blockade, which is another trigger of IPR gene expression [9] (Fig 2C). We  
197 used bortezomib, which is a small molecule inhibitor of the 26S proteasome. Here again,  
198 we found that bortezomib treatment induced IPR gene expression in *pals-22 pals-25*  
199 mutants at levels similar to wild-type animals. Therefore *pals-22/25* appear to regulate  
200 IPR gene expression in parallel to infection and proteasomal stress.

201

### 202 ***pals-25* mutations reverse multiple physiological phenotypes caused by *pals-22*** 203 **mutations**

204 *pals-22* mutants have several striking physiological phenotypes, including slowed growth  
205 and shorter lifespans, as well as increased resistance to proteotoxic stress like heat  
206 shock [6]. Therefore, we investigated whether mutations in *pals-25* suppress these  
207 phenotypes of *pals-22* mutants. First, we investigated developmental rate by measuring  
208 the fraction of animals that reach the fourth larval (L4) stage by 48 hours after  
209 embryogenesis. Nearly all wild-type animals are L4 at this timepoint, whereas less than  
210 20% of *pals-22* mutants are L4 (Fig 3A). We found that mutations in *pals-25* completely  
211 reverse this delayed development of *pals-22* mutants, with nearly all *pals-22 pals-25*  
212 mutants reaching the L4 stage by 48 hours (Fig 3A). Next, we analyzed lifespan, as  
213 previous work showed that *pals-22* mutants have a significantly shortened lifespan  
214 compared to wild-type animals [6, 8]. Here again we found that *pals-25* mutations  
215 reversed this effect, with *pals-22 pals-25* mutants having lifespans comparable to wild-  
216 type animals (Fig 3B, S3A-B Fig). Next, we investigated the effect of *pals-25* mutations  
217 on the thermotolerance capacity of *pals-22* mutants, which is greatly enhanced  
218 compared to wild-type animals. We found that *pals-22 pals-25* double mutants have

219 survival after heat shock at levels similar to wild-type animals (Fig 3C, S3C-D Fig),  
220 indicating that *pals-25* is required for the enhanced thermotolerance of *pals-22* mutants.  
221 Thus, these results show that in a *pals-22* mutant background, wild-type *pals-25* is  
222 required to delay development, shorten lifespan and enhance thermotolerance.

223

224 **Fig 3. *pals-25* mutations suppress diverse phenotypes of *pals-22* mutants.**

225 (A) *pals-25* mutation suppresses the developmental delay of *pals-22* mutants. Fraction of  
226 animals reaching the L4 larval stage 48 hours after eggs were laid is indicated. Results  
227 shown are the average of three independent biological replicates, with 100 animals  
228 assayed in each replicate. Error bars are SD. \*\*\*  $p < 0.001$  with Student's t-test. (B)  
229 Lifespan of wild type, *pals-22(jy3)*, and *pals-22(jy3) pals-25(jy9)* animals. Assays were  
230 performed with 40 animals per plate, and three plates per strain per experiment. This  
231 experiment was repeated three independent times with similar results, with data from a  
232 representative experiment shown. See Figures S2A and S2B for other replicates. p-value  
233 for *pals-22(jy3)* compared to *pals-22(jy3) pals-25(jy9)* is  $<0.0001$  using the Log-rank test.  
234 (C) The increased survival of *pals-22* mutants after heat shock is suppressed by  
235 mutations of *pals-25*. Animals were incubated for 2 hours at 37°C followed by 24 hours  
236 at 20°C, and then assessed for survival. Strains were tested in triplicate, with at least 30  
237 animals per plate. Mean fraction alive indicates the average survival among the  
238 triplicates, errors bars are SD. \*\*  $p < 0.01$ . Assay was repeated three independent times  
239 with similar results, and data from a representative experiment are shown. See Figures  
240 S2C and S2D for other replicates. (D-I) *pals-25* mutation suppresses transgene silencing  
241 in *pals-22* mutants. (D) *ric-19p::GFP* expression quantified in *pals-22* and *pals-22 pals-*  
242 *25* mutants using a COPAS Biosort machine to measure the mean GFP signal and  
243 length of individual animals, indicated by green dots. Mean signal of the population is

244 indicated by black bars with error bars as SD. Graph is a compilation of three  
245 independent replicates, with at least 100 animals analyzed in each replicate. \*\*\*  $p <$   
246 0.001 with Student's t-test. In (E-I), green is neuronal expression of *ric-19p::GFP*. Shown  
247 are (E) wild-type, (F) *pals-22(jy1)*, (G) *pals-22(jy3)*, (H) *pals-22(jy1) pals-25(jy11)*, and (I)  
248 *pals-22(jy3) pals-25(jy9)* animals. Images are overlays of green and Nomarski channels  
249 and were taken with the same camera exposure for all. Scale bar, 100  $\mu\text{m}$ .

250

251 Previous work from the Hobert lab identified *pals-22* in a screen for regulators of reporter  
252 gene expression in neurons [8]. They found that mutations in *pals-22* led to decreased  
253 levels of GFP reporter expression in neurons and other tissues, and wild-type *pals-22*  
254 thus acts as an 'anti-silencing' factor of multi-copy transgene expression. Therefore, we  
255 analyzed the effects of *pals-25* mutations on transgene silencing in *pals-22* mutants.  
256 Here we found that *pals-25* mutations reverse the enhanced silencing of a neuronally  
257 expressed GFP transgene in *pals-22* mutants (Fig 3D-I), indicating that wild-type *pals-25*  
258 activity is required to silence expression from multi-copy transgenes in a *pals-22* mutant  
259 background. Of note, previous work found that a *pals-25* mutation alone does not affect  
260 transgene silencing [8]. In summary, mutations in *pals-25* appear to fully reverse all  
261 previously described phenotypes of *pals-22* mutants.

262

263 ***pals-22* mutants have immunity against coevolved intestinal pathogens of the**  
264 **intestine, which is suppressed by *pals-25* mutations**

265 In addition to the previously described phenotypes of *pals-22* mentioned above, we  
266 analyzed resistance of these mutants to intracellular infection. First we analyzed the  
267 resistance of *pals-22* mutants to *N. parisii* infection. We fed animals a defined dose of  
268 microsporidia spores and measured pathogen load inside intestinal cells. We analyzed

269 pathogen load at 30 hours post infection (hpi), when *N. parisii* is growing intracellularly in  
270 the replicative meront stage, and found greatly lowered pathogen load in *pals-22*  
271 mutants compared to wild-type animals (Fig 4A-F). We then tested *pals-22 pals-25*  
272 double mutants and found these animals to have resistance comparable to wild-type.  
273 One explanation for the altered levels of *N. parisii* observed in the intestines of *pals-22*  
274 mutant animals is that these mutants have lowered feeding or accumulation of pathogen  
275 in the intestine, and thus simply have a lower exposure to *N. parisii*. To address this  
276 concern, we added fluorescent beads to our *N. parisii* infection assay and measured  
277 accumulation in the intestinal lumen. Here we found that *pals-22* mutants and *pals-22*  
278 *pals-25* double mutants accumulated fluorescent beads at comparable levels to wild-type  
279 animals (S4A Fig), suggesting that their pathogen resistance to *N. parisii* is not simply  
280 due to lowered exposure to the pathogen in the intestinal lumen. As a positive control in  
281 this assay we tested *eat-2(ad465)* mutants and found that they had reduced fluorescent  
282 bead accumulation, consistent with their previously characterized feeding defect [13].  
283 Altogether, these results indicate that *pals-22* and *pals-25* regulate resistance to  
284 infection by microsporidia.

285

286 **Figure 4. *pals-22* mutants have increased resistance to infection by *N. parisii* or**  
287 **Orsay virus, dependent on *pals-25*.**

288 (A-E) Images of (A) wild-type, (B) *pals-22(jy1)*, (C) *pals-22(jy3)*, (D) *pals-22(jy1) pals-*  
289 *25(jy11)*, and (E) *pals-22(jy3) pals-25(jy9)* animals infected with *N. parisii* as L1s, fixed  
290 30 hours post infection, and stained by FISH with an *N. parisii*-specific probe (red). Scale  
291 bar, 100  $\mu$ m. (F) *N. parisii* FISH signal quantified using a COPAS Biosort machine to  
292 measure the mean red signal and length of individual animals, indicated by red dots.  
293 Mean signal of the population is indicated by black bars, with error bars as SD. Graph is

294 a compilation of three independent replicates, with at least 100 animals analyzed in each  
295 replicate. \*\*\*  $p < 0.001$  with Student's t-test. (G) Fraction of animals infected with the  
296 Orsay virus 18 hours post infection is indicated. Animals were fixed and stained by FISH  
297 with a virus-specific probe, and scored visually for infection. Results shown are the  
298 average of three independent biological replicates, with 100 animals assayed in each  
299 replicate. Error bars are SD. \*\*\*  $p < 0.001$  with Student's t-test. (H-L) Images of (H) wild-  
300 type, (I) *pals-22(jy1)*, (J) *pals-22(jy3)*, (K) *pals-22(jy1) pals-25(jy11)*, and (L) *pals-22(jy3)*  
301 *pals-25(jy9)* animals infected with the Orsay virus as L1s, fixed 18 hours post infection,  
302 and stained by FISH with a virus-specific probe (red). Scale bar, 100  $\mu\text{m}$ . (M)  
303 Quantification of dsRed fluorescence levels in wild-type, *pals-22*, and *pals-22 pals-25*  
304 animals after 16 hours of exposure to dsRed-expressing PA14. Red fluorescence was  
305 measured using a COPAS Biosort machine to measure the mean red signal and length  
306 of individual animals, indicated by red dots. Mean signal of the population is indicated by  
307 black bars, with error bars as SD. Graph is a compilation of three replicates, with at least  
308 100 animals analyzed in each replicate. \*\*\*  $p < 0.001$  with Student's t-test.

309

310 We also investigated resistance of *pals-22* mutants and *pals-22 pals-25* double mutants  
311 to other pathogens. First, we measured resistance to infection by the Orsay virus. Like  
312 *N. parisii*, Orsay virus is a natural pathogen of *C. elegans*, and replicates inside of *C.*  
313 *elegans* intestinal cells [14]. We used FISH staining of Orsay viral RNA to quantify the  
314 fraction of worms infected at 18 hpi. Here we found that *pals-22* mutants had significantly  
315 decreased viral load when compared to wild-type animals (Fig 4G-L). This lowered viral  
316 infection in *pals-22* mutants was fully reversed in *pals-22 pals-25* mutants back to wild-  
317 type levels. Importantly, we confirmed that *pals-22* and *pals-22 pals-25* mutants do not  
318 have altered fluorescent bead accumulation in the intestine compared to wild-type

319 animals in the presence of virus (S4B Fig), indicating that their lowered viral load is not  
320 likely due to lowered exposure to the virus.

321

322 Interestingly, we found that *pals-22* mutants did not have reduced pathogen loads when  
323 infected with the Gram-negative bacterial pathogen *Pseudomonas aeruginosa* (clinical  
324 isolate PA14) (Fig 4M). In fact, these mutants had increased pathogen load, which was  
325 suppressed by mutations in *pals-25*. To our knowledge *P. aeruginosa* species are not  
326 common pathogens of nematodes in the wild, although under laboratory conditions, *P.*  
327 *aeruginosa* PA14 does accumulate in the *C. elegans* intestinal lumen and causes a  
328 lethal infection [15]. In summary *pals-22* mutants have increased resistance to natural  
329 pathogens of the intestine, but increased susceptibility to PA14, a ‘non-natural’ pathogen  
330 of the intestine.

331

### 332 **RNA-seq analysis of *pals-22/25*-upregulated genes define the IPR**

333 Previous work indicated that *N. parisii* and the Orsay virus induce a common set of  
334 genes, despite these being very different pathogens [9]. We called eight of these genes  
335 the IPR subset [6], and here we show they are regulated by *pals-22/25* (Fig 2A). To  
336 identify additional genes regulated by *pals-22/25*, we performed RNA-seq analysis of  
337 *pals-22* mutants, *pals-22 pals-25* mutants, and wild-type animals. We performed  
338 differential gene expression analysis using a FDR<0.01 cutoff (see Materials and  
339 Methods for a complete description of criteria) and determined that 2,756 genes were  
340 upregulated in *pals-22* mutants compared to wild-type animals (Fig 5A, S7 Table). Next  
341 we compared *pals-22* mutants to *pals-22 pals-25* double mutants and found that 744  
342 genes were upregulated (Fig 5A, S7 Table). Of these two comparisons, there are 702  
343 genes in common that are upregulated both in *pals-22* mutants compared to wild-type

344 animals and in *pals-22* mutants compared to *pals-22 pals-25* double mutants (Fig 5A).  
345 Therefore, these 702 genes are negatively regulated by wild-type *pals-22* and require  
346 the activity of the wild-type *pals-25* for their induction in the absence of *pals-22*. These  
347 702 genes include genes like our *pals-5* reporter (Fig 1) and other IPR genes (Fig 2).

348

349 **Fig 5. The *pals-22/25* gene pair transcriptionally regulates genes that are induced**  
350 **by *N. parisii* infection or proteasome blockade**

351 (A) Venn diagram comparing 1) genes upregulated in *pals-22* mutants compared to wild-  
352 type animals, 2) genes upregulated in *pals-22* mutants compared to *pals-22 pals-25*  
353 double mutants and 3) genes induced in wild-type animals in response to *N. parisii*  
354 infection. Gene sets 1 and 2 were obtained from RNA-seq data outlined in this study,  
355 and Gene set 3 was obtained via RNA-seq in a previous study [9]. We define the IPR  
356 genes as the 80 genes common across the three gene sets. (B-D) The relative mRNA  
357 levels measured by RNA-seq in: *pals-22(jy3)* animals compared to wild-type; *pals-*  
358 *22(jy3) pals-25(jy9)* animals compared to wild-type; and wild-type animals treated with  
359 the proteasome inhibitor bortezomib (BTZ) compared to DMSO (vehicle control for BTZ).  
360 \* FDR<0.01 as calculated by edgeR and limma (see Materials and Methods) indicates  
361 the gene is considered to be differentially expressed. (B) *pals* genes induced by *N.*  
362 *parisii* infection are also regulated by *pals-22/25* and induced by BTZ. (C) Species-  
363 specific F26F2 genes are regulated by the *pals-22/25* gene pair and are induced by BTZ.  
364 (D) The Cullin-Ring Ligase components Cullin (*cul*) and Skp-related (*skr*) genes that are  
365 upregulated during *N. parisii* infection are also regulated by the *pals-22/25* gene pair and  
366 induced by BTZ. (E) Venn Diagram showing overlap between: IPR genes defined in (A);  
367 genes upregulated by treatment with BTZ; and genes upregulated due to *skn-1* RNAi  
368 [16]. See Tables S2 and S3 for detailed expression levels of genes discussed here.

369

370 We next compared these 702 *pals-22/25* regulated genes to genes induced during *N.*  
371 *parisii* infection identified in a previous study [9] to expand our list of IPR genes. Out of  
372 127 genes induced during *N. parisii* infection we found that the *pals-22/25* gene pair  
373 regulated mRNA expression of 80 of these genes (Fig 5A). Specifically, of the 25 *pals*  
374 genes induced upon intracellular infection, all are induced in *pals-22* mutants and  
375 reverted back to wild-type levels in *pals-22 pals-25* double mutants (Fig 5B, S7 Table).  
376 Notably, all *pals* genes that are not regulated by *pals-22/25* are also not induced by  
377 infection. Furthermore, the other nematode-specific genes F26F2.1, F26F2.3, and  
378 F26F2.4, which are induced by *N. parisii* and Orsay virus infection, were also found to be  
379 induced in *pals-22* mutants and brought back to wild-type levels in *pals-22 pals-25*  
380 double mutants (Fig 5C). In addition, we found that the ubiquitin ligase components are  
381 similarly regulated (Fig 5D). These studies thus define IPR genes as the 80 genes that  
382 are: 1) induced by *N. parisii* infection, 2) induced in a *pals-22* mutant background, and 3)  
383 reversed back to wild-type levels in *pals-22 pals-25* double mutants.

384

385 **Genes regulated by *pals-22/25* and infection are also regulated by proteasomal**  
386 **stress**

387 Previous work indicated that blockade of the proteasome, either pharmacologically or  
388 genetically, will induce expression of a subset of IPR genes [9]. To determine the IPR  
389 genes that are induced by proteasome stress, we performed RNA-seq analysis to define  
390 the whole-genome response to this stress. Again, we conducted differential expression  
391 analysis and compared gene expression of animals after 4 hours of exposure to the  
392 proteasome inhibitor bortezomib compared to the DMSO vehicle control. From these  
393 experiments we determined that 988 genes are induced following bortezomib treatment,



394 using the cut-off mentioned above and described in the Materials and Methods.  
395 Interestingly, nearly all of the IPR genes described above are also induced following  
396 bortezomib treatment (Fig 5E). Previous work has shown that genes induced by *N.*  
397 *parisii* do not include the proteasome subunits induced by proteasome blockade as part  
398 of the bounceback response [9]. The bounceback response is induced via the  
399 transcription factor SKN-1. Consistent with these results, here we find that the IPR genes  
400 induced by bortezomib are distinct from those regulated by the transcription factor SKN-  
401 1, as defined by a previous study [16]. The overlap between SKN-1 regulated genes and  
402 IPR genes includes only one gene (Fig 5E).

403

404 As shown earlier, *pals-22* mutants have increased resistance to heat shock, and  
405 previous work indicated that there is overlap between genes induced by chronic heat  
406 stress and genes induced by *N. parisii* and virus infection [9]. However, the genes in  
407 common are distinct from the canonical chaperones, or Heat Shock Proteins (HSPs),  
408 which are induced by the heat shock transcription factor HSF-1. To learn more about the  
409 connection between heat shock response, HSF-1, and the IPR, we compared the IPR  
410 genes with those induced by HSF-1 as defined in a previous study [17]. Here we found 8  
411 genes in common between our set of 80 IPR genes and the set of 368 genes  
412 upregulated by HSF-1, none of which are predicted to encode chaperone proteins (S10  
413 Table). We also compared the 368 genes upregulated by HSF-1 with the 702 genes that  
414 are regulated by *pals-22/25* and found 59 genes in common (S10 Table). These genes  
415 include secreted C-type lectins and F-box genes, but do not include chaperones. In  
416 summary, HSF-1 regulates 59 genes in common with those regulated by *pals-22/25*, but  
417 only 8 of these are IPR genes.

418

419 ***pals-22* and *pals-25* regulate expression of genes induced by other natural**  
420 **pathogens**

421 Next, we used Gene Set Enrichment Analysis (GSEA) to broadly compare *pals-22/25*-  
422 regulated genes to genes regulated by other pathogens, stressors, and stress-related  
423 pathways. Here we found that *pals-22/25* does not significantly regulate expression of  
424 genes induced by the Gram-negative bacterial pathogen *P. aeruginosa* or the Gram-  
425 positive bacterial pathogens *Staphylococcus aureus* and *Enterococcus faecalis* as  
426 analyzed in previous studies (Fig 6). Notably, the strains used in these studies are  
427 clinical isolates. Furthermore, these pathogen species are not known to be natural  
428 pathogens of nematodes and are not found inside *C. elegans* intestinal cells before there  
429 is extensive tissue damage in the host [18]. (Refer to S9 Table for additional  
430 comparisons among genes regulated by *pals-22/25*, bortezomib treatment, and other  
431 pathogens and stress pathways.)

432

433 **Fig 6. Functional analysis of genes transcriptionally regulated by the *pals-22/25***  
434 **gene pair**

435 Correlation of genes transcriptionally regulated by the *pals-22/25* gene pair and genes  
436 differentially expressed due to bortezomib treatment with genes that are up- or  
437 downregulated in response to infection by pathogens or other environmental stresses.  
438 Analysis was performed using the GSEA 3.0 software package (see Materials and  
439 Methods) and correlation is quantified as a Normalized Enrichment Score (NES). A  
440 positive NES (yellow) indicates correlation with upregulated genes in the denoted  
441 comparison while a negative NES (blue) indicates correlation with downregulated genes.  
442 Black cells indicate no significant correlation was detected, a FDR>0.25, or p>0.05).

443 \*FDR<0.05. For more detailed results, see S9 Table. For details on the gene sets used  
444 see S8 Table.

445

446 Because *pals-22* and *pals-25* regulate expression of a majority of the genes induced by  
447 natural intestinal pathogens like *N. parisii* and the Orsay virus, we investigated whether  
448 they regulate the transcriptional response to natural pathogens that infect other tissues.

449 The fungal pathogen *Drechmeria coniospora* infects and penetrates the epidermis of

450 nematodes, triggering a GPCR signaling pathway that upregulates expression of

451 neuropeptide-like (*nlp*) genes including *nlp-29* to promote defense [15]. Our

452 transcriptome analysis shows that *pals-22/25* regulate a significant number of genes in

453 common with *Drechmeria* infection (S10 Table). Notably these genes do not include the

454 well-characterized neuropeptide *nlp* defense genes, although they do include many of

455 the *pals* genes. A more recently described natural pathogen of *C. elegans* is

456 *Myzocytiopsis humicola*, which is an oomycete that also infects through the epidermis

457 and causes a lethal infection [19]. Here as well, *pals-22/25* regulate a significant number

458 of genes in common with those induced by *M. humicola* infection, including the chitinase-

459 like '*chil*' genes that promote defense against this pathogen (S10 Table). Interestingly,

460 these *chil* genes, like the *pals* genes, are species-specific [8, 19].

461

462 We next used Ortholist [20] to determine which genes identified from our RNA-seq

463 analyses have predicted human orthologs. Of the 702 genes regulated by *pals-22/25*,

464 279 genes (39.7%) have predicted human orthologs (S11 Table). In contrast, of the 368

465 genes induced in *hsf-1* mutants 190 (51.6%) have predicted human orthologs.

466 Therefore, more of the genes regulated by the conserved transcription factor *hsf-1* have

467 human orthologs compared to genes regulated by the *C. elegans*-specific *pals-22/25*

468 gene pair. Furthermore, when we restrict our analysis to just the 80 IPR genes, only 14  
469 (17.5%) have predicted human orthologs, indicating that the transcriptional response to  
470 natural infection is enriched for genes that are not well-conserved.

471

472 ***pals-22/25* control expression of epidermal defense genes induced by oomycetes**

473 As described above, the RNA-seq analysis of genes regulated by *pals-22/25* indicated  
474 that this gene pair controls expression of genes induced by diverse natural pathogens of  
475 *C. elegans*. Indeed, in a forward genetic screen for *C. elegans* genes that regulate  
476 expression of the *M. humicola*-induced *chil-27p::GFP* reporter, we isolated independent  
477 loss-of-function alleles of *pals-22* (Fig 7A). These mutant alleles cause constitutive  
478 expression of *chil-27p::GFP* in the epidermis in the absence of infection (Fig 7B). RNAi  
479 against *pals-22* also led to constitutive GFP expression (S12 Fig), in a manner that is  
480 indistinguishable from that observed upon infection with *M. humicola*. These results  
481 indicate that *pals-22* acts as a negative regulator of *chil-27* expression in the epidermis.

482

483 **Fig 7. *pals-22* and *pals-25* regulate expression of *chil-27* in the epidermis.**

484 (A) *pals-22* and *pals-25* gene coding structure (UTR not shown), with blue exons for  
485 *pals-22* and red exons for *pals-25*. See S1 Table for residues altered. (B) Expression of  
486 *chil-27p::GFP* is regulated by *pals-22* and *pals-25*. Shown are control, *pals-22(icb88)*,  
487 *pals-22(icb90)*, *pals-22(icb90) pals-25(icb91)*, and *pals-22(icb90) pals-25(icb92)*  
488 animals. The *col-12p::mCherry* transgene is constitutively expressed in the epidermis.  
489 Scale bar, 100  $\mu$ m. (C) Relative levels of *chil* gene expression. *pals-22/25* regulate *chil*  
490 genes that are induced upon infection by oomycete. \*FDR<0.01 as calculated by edgeR  
491 and limma (see Materials and Methods) indicates the gene is considered to be  
492 differentially expressed.

493

494 We then used a *pals-22; chil-27p::GFP* strain for a suppressor screen, analogous to the  
495 one described earlier for suppressors of GFP expression in *pals-22; pals-5p::GFP* (Fig  
496 1). Interestingly, in this new screen we isolated two new alleles of *pals-25* which fully  
497 suppress the constitutive gene expression of *chil-27p::GFP* seen in *pals-22* mutants (Fig  
498 7A-B), indicating that wild-type *pals-25* acts as a positive regulator of *chil-27* expression.  
499 These observations are consistent with our differential expression analysis, which  
500 determined that *chil-27* is induced in a *pals-22* mutant background and that *pals-25* is  
501 required for this induction (Fig 7C). Therefore, *pals-22/25* act as a switch not only for  
502 genes induced in the intestine by natural intestinal pathogens, but also as a switch for  
503 genes induced in the epidermis by natural epidermal pathogens of *C. elegans*.

504

## 505 **Discussion**

506 In many organisms, there is a balance between growth and pathogen resistance. In  
507 particular, many studies in plants have indicated that genetic immunity to disease comes  
508 at a cost to the yield of crops [21]. Here we define a program in *C. elegans* that controls  
509 a balance between organismal growth with resistance to natural pathogens, which is  
510 regulated by the *pals-22/25* species-specific gene pair. These genes act as a switch  
511 between a 'defense program' of enhanced resistance against diverse natural pathogens  
512 like microsporidia and virus, improved tolerance of proteotoxic stress and increased  
513 defense against exogenous RNA [8], and a 'growth program' of normal development and  
514 lifespan (Fig 8). We call this physiological defense program the "IPR" and it appears to  
515 be distinct from other canonical stress response pathways in *C. elegans*, including the  
516 p38 MAP kinase pathway, the insulin-signaling pathway, and the heat shock response,  
517 among others [6]. Our previous analyses indicated that ubiquitin ligases may play a role

518 in executing the IPR program, as the cullin/CUL-6 ubiquitin ligase subunit is required for  
519 the enhanced proteostasis capacity of *pals-22* mutants [6].

520

521 **Fig 8. Model for *pals-22/pals-25* regulation of response to natural pathogens of *C.***  
522 ***elegans*.**

523

524 *pals-22* mutants are highly resistant to the microsporidian pathogen *N. parisii*, which is  
525 the most common parasite found in wild-caught *C. elegans* [22, 23]. Little is known about  
526 innate immune pathways that provide defense against *N. parisii*. Canonical immune  
527 pathways in *C. elegans* like the p38 MAP kinase pathway provide defense against most  
528 pathogens tested in *C. elegans* but do not provide defense against *N. parisii* [12]. The  
529 mechanism by which *pals-22/25* regulate resistance to *N. parisii* is not clear. Our RNA-  
530 seq analysis demonstrates that *pals-22/25* affect expression of hundreds of genes in the  
531 genome. In particular, most of the genes induced by the natural intracellular pathogens  
532 Orsay virus and *N. parisii* are controlled by *pals-22* and *pals-25*, although the function of  
533 these IPR genes in defense is unknown. Interestingly, we found that *pals-22/25* regulate  
534 expression of genes induced not only by natural intestinal pathogens but also of genes  
535 induced by natural epidermal pathogens, such as the oomycete species *M. humicola*. *M.*  
536 *humicola* induces expression of *chil*-gene family, and genetic analysis shows these  
537 genes promote defense against *M. humicola* [19]. Notably, we identified *pals-22/25* in  
538 independent forward genetic screens for regulators of *chil-27* and found that they  
539 regulate expression of this defense gene in the epidermis. Thus, *pals-22/25* regulate  
540 expression of genes induced by diverse natural pathogens.

541

542 While *pals-25* is required to activate IPR gene expression in a *pals-22* mutant  
543 background, it is not required for activation of IPR gene expression in response to *N.*  
544 *parisii* infection or proteasomal stress. Therefore, *pals-22/25* may not mediate detection  
545 of these pathogens, although they might mediate detection and be redundant with other  
546 factors. Intriguingly, the *pals-22/25* gene pair share evolutionary and phenotypic features  
547 with plant R gene pairs, which serve as sensors for virulence factors delivered into host  
548 cells by co-evolved plant pathogens. For example, the *Arabidopsis thaliana* gene pair  
549 RRS1 and RPS4 are species-specific, share the same promoter, and direct opposite  
550 outcomes, with RRS1 inhibiting and RPS4 promoting 'effector-triggered immunity'  
551 against natural pathogens [24, 25]. Similarly, *pals-22* and *pals-25* are species-specific,  
552 appear to be in an operon together, and direct opposite physiological outcomes including  
553 defense against natural pathogens. RRS1 and RPS4 proteins directly bind to each other,  
554 and RRS1 normally inhibit RPS4 function until detection of bacterial virulence factors, at  
555 which point RRS1 inhibition is relieved and RPS4 is free to promote pathogen defense,  
556 although the steps downstream of RRS1/RPS4 are poorly understood. Although the *pals*  
557 genes do not share sequence similarity with the R genes, in this analogy PALS-22 would  
558 inhibit PALS-25 and serve as the 'tripwire' to detect virulence factors from natural  
559 pathogens and free PALS-25 to promote the IPR defense program. While this model is  
560 attractive, it is purely speculative as we currently have no direct evidence that PALS-22  
561 detects virulence factors. Identification of such hypothetical virulence factors would be  
562 the focus of future studies.

563

564 The molecular events by which *C. elegans* detects infection are poorly understood,  
565 although nematodes do appear to use a form of effector-triggered immunity or  
566 'surveillance immunity'. Studies with several distinct pathogens have indicated that *C.*

567 *C. elegans* induces defense gene expression in response to perturbation of core processes  
568 like translation and the ubiquitin-proteasome system [26]. For example, studies with *P.*  
569 *aeruginosa* demonstrated that *C. elegans* detects the presence of the translation-  
570 blocking Exotoxin A through its effects on host translation, not through detection of the  
571 shape of the toxin [27, 28]. In addition to this mode of detection, *C. elegans* may also  
572 detect specific molecular signatures like canonical Pathogen-Associated Molecular  
573 Patterns (PAMPs). In all likelihood, several types of pathogen detection are used by *C.*  
574 *elegans*. Surprisingly however, there have been no direct PAMP ligand/receptor  
575 interactions demonstrated for pattern recognition receptors (PRR) in the worm, although  
576 there has been a Damage-Associated Molecular Pattern (DAMP)/G-protein-coupled  
577 receptor interaction demonstrated to be critical for response to *Drechmeria* infection [29].  
578 Indeed, *C. elegans* lacks many PRR signaling pathways that are well described in flies  
579 and mammals. For example, the *C. elegans* single Toll-like receptor *tol-1* does not act  
580 canonically and worms appear to have lost its downstream transcription factor NFkB,  
581 which is critical for innate immunity in flies and mammals [30]. Perhaps conservation of  
582 immune genes is only reserved for defense against rare, ‘non-natural’ pathogens,  
583 because genes that are important for immunity are subject to attack and inhibition by  
584 microbes [31]. Thus, immune genes that provide defense against natural pathogens from  
585 the recent evolutionary past will not be broadly conserved but rather will be species-  
586 specific, like rapidly evolving R genes in plants. While R genes have been shown to  
587 encode proteins that detect virulence factors secreted into host cells by co-evolved plant  
588 pathogens, the mechanism by which they activate downstream immune signaling is  
589 unclear. We propose that the IPR physiological program regulated by the *pals-22/25*  
590 antagonistic paralogs in *C. elegans* could be analogous to effector-triggered immunity



591 regulated by opposing R gene pairs like RRS1/RPS4 used in plants for resistance  
592 against co-evolved pathogens.  
593  
594 Interestingly, an example of vertebrate-specific antagonistic paralogs has recently been  
595 described to play a role in regulating nonsense-mediated RNA decay (NMD) [32]. These  
596 studies provide a potential explanation to the long-standing question of how gene  
597 duplications are retained, when they are presumably redundant immediately following  
598 gene duplication. Specifically, this model predicts that gene duplication events can be  
599 rapidly retained if the proteins made from these genes are involved in protein-protein  
600 interactions. With just one non-synonymous nucleotide change that switches a wild-type  
601 copy to become dominant negative within a multimeric signaling complex, a gene  
602 duplication event can be selected for and retained in the heterozygote state – i.e. in one  
603 generation. Perhaps in this way, new genes can be born and survive, when gene pairs  
604 can evolve to direct opposing functions like the Upf3a/3b paralogs in NMD, and the  
605 RRS1/RPS4 and *pals-22/25* paralogs in immunity/growth.

606

607

608

## 609 **Methods**

### 610 *Strains*

611 *C. elegans* were maintained at 20°C on Nematode Growth Media (NGM) plates seeded  
612 with Streptomycin-resistant *E. coli* OP50-1 bacteria according to standard methods [33].  
613 We used N2 wild-type animals. Mutant or transgenic strains were backcrossed at least  
614 three times. See S1 Table for a list of all strains used in this study.

615

616 *EMS screens and cloning of alleles*

617 *pals-22* mutant worms (either the *jy1* or *jy3* allele) carrying the *jyls8[pals-5p::GFP, myo-*  
618 *2p::mCherry]* transgene were mutagenized with ethyl methane sulfonate (EMS) (Sigma)  
619 using standard procedures as described [34]. L4 stage P0 worms were incubated in 47  
620 mM EMS for 4 hours at 20°C. Worms were screened in the F2 generation for decreased  
621 expression of GFP using the COPAS Biosort machine (Union Biometrica).

622 Complementation tests were carried out by generating worms heterozygous for two  
623 mutant alleles and scoring *pals-5p::GFP* fluorescence. For whole-genome sequencing  
624 analysis of mutants, genomic DNA was prepared using a Puregene Core kit (Qiagen)  
625 and 20X sequencing coverage was obtained. We identified only one gene (*pals-25*) on  
626 LGIII containing variants predicted to alter function in both mutants sequenced (*jy9* and  
627 *jy100*). Additional *pals-25* alleles were identified by Sanger sequencing. Screens in the  
628 strains carrying the *icbls4[chil-27p::GFP, col-12p::mCherry]* transgene were performed  
629 in a similar manner except that we used 24 mM EMS to recover the *pals-22* alleles  
630 (*icb88, icb90*) and 17 mM EMS for the *pals-22(icb90)* suppressor screen and that in both  
631 cases we selected F2 animals manually using a Zeiss Axio ZoomV16 dissecting scope.  
632 The two *pals-22* alleles (*icb88, icb90*) were identified by whole genome sequencing of  
633 GFP positive F2 recombinants after crossing to the polymorphic isolate CB4856 as  
634 previously described [35] whereas the two *pals-25* alleles were found by direct  
635 sequencing of the mutant strains. The *pals-22(icb89)* allele was identified by Sanger  
636 sequencing. See S1 Table for a list of all mutations identified.

637

638 *RNA interference*

639 RNA interference was performed using the feeding method. Overnight cultures of RNAi  
640 clones in the HT115 bacterial strain were seeded onto NGM plates supplemented with

641 5mM IPTG and 1mM carbenicillin and incubated at 25°C for 1 day. Eggs from bleached  
642 parents or synchronized L1 stage animals were fed RNAi until the L4 stage at 20°C. For  
643 all RNAi experiments an *unc-22* clone leading to twitching animals was used as a  
644 positive control to test the efficacy of the RNAi plates. The *pals-22* RNAi clone (from the  
645 Ahringer RNAi library) was verified by sequencing. The *pals-25* RNAi clone was made  
646 with PCR and includes 1079 base pairs spanning the second, third, and fourth exons of  
647 *pals-25*. This sequence was amplified from N2 genomic DNA, cloned into the L4440  
648 RNAi vector, and then transformed into HT115 bacteria for feeding RNAi experiments.

#### 649 *Quantitative RT-PCR*

650 Endogenous mRNA expression changes were measured with qRT-PCR as previously  
651 described [6]. Synchronized L1 worms were grown on NGM plates at 20°C to the L4  
652 stage and then collected in TriReagent (Molecular Research Center, Inc.) for RNA  
653 extraction. For *N. parisii* infection,  $7 \times 10^6$  spores were added to plates with L4 stage  
654 worms and then incubated at 25°C for 4 hours before RNA isolation. Bortezomib (or an  
655 equivalent amount of DMSO) was added to L4 stage worms for a final concentration of  
656 20  $\mu$ M; plates were then incubated at 20°C for 4 hours before RNA isolation. At least two  
657 independent biological replicates were measured for each condition, and each biological  
658 replicate was measured in duplicate and normalized to the *snb-1* control gene, which did  
659 not change upon conditions tested. The Pfaffl method was used for quantifying data [36].

#### 660 *Heat shock assay*

661 Worms were grown on standard NGM plates until the L4 stage at 20°C and then shifted  
662 to 37°C for two hours. Following heat shock, plates were laid in a single layer on the  
663 bench top for 30 minutes to recover, and then moved to a 20°C incubator overnight.  
664 Worms were scored in a blinded manner for survival 24 hours after heat shock; animals

665 not pumping or responding to touch were scored as dead. Three plates were assayed for  
666 each strain in each replicate, with at least 30 worms per plate, and three independent  
667 assays were performed.

668

#### 669 *GFP fluorescence measurement*

670 Synchronized L1 stage animals were grown at 20°C to the L4 stage. The COPAS Biosort  
671 machine (Union Biometrica) was used to measure the time of flight (as a measure of  
672 length) and fluorescence of individual worms. At least 100 worms were measured for  
673 each strain, and all experiments were repeated three times.

674

#### 675 *Lifespan*

676 L4 stage worms were transferred to 6 cm NGM plates seeded with OP50-1 bacteria and  
677 incubated at 25°C. Worms were scored every day, and animals that did not respond to  
678 touch were scored as dead. Animals that died from internal hatching or crawled off the  
679 plate were censored. Worms were transferred to new plates every day throughout the  
680 reproductive period. Three plates were assayed for each strain in each replicate, with 40  
681 worms per plate.

682

#### 683 *Microscopy*

684 Worms were anesthetized with 10  $\mu$ M levamisole in M9 buffer and mounted on 2%  
685 agarose pads for imaging. Images in Figure S1B and S1C were captured with a Zeiss  
686 LSM700 confocal microscope. All other *C. elegans* images were captured with a Zeiss  
687 Axiolmager M1 or Axio Zoom.V16.

688

#### 689 *N. parisii* and Orsay virus infection assays

690 *N. parisii* spores were prepared as previously described [37], and Orsay virions were  
691 prepared as described previously [9]. For pathogen load analysis, synchronized L1  
692 worms were plated with a mixture of OP50 bacteria and  $5 \times 10^5$  *N. parisii* spores or a  
693 1:20 dilution of Orsay virus filtrate, and then incubated at 25°C for either 30 hours (*N.*  
694 *parisii*) or 18 hours (Orsay virus) before fixing with paraformaldehyde. Fixed worms were  
695 stained with individual FISH probes conjugated to the red Cal Fluor 610 dye (Biosearch  
696 Technologies) targeting either *N. parisii* ribosomal RNA or Orsay virus RNA. *N. parisii*  
697 pathogen load was measured with the COPAS Biosort machine (Union Biometrica).  
698 Orsay virus infection was assayed visually using the 10x objective on a Zeiss  
699 Axiomager M1 microscope. In feeding measurement assays, plates were set up as for  
700 pathogen infection with the addition of fluorescent beads (Fluoresbrite Polychromatic  
701 Red Microspheres, Polysciences Inc.). Worms were fixed in paraformaldehyde after 30  
702 minutes and red fluorescence signal was measured with the COPAS Biosort machine  
703 (Union Biometrica).

704

#### 705 *P. aeruginosa* pathogen load

706 Overnight cultures of a *P. aeruginosa* PA14-dsRed strain [38] were seeded onto SK  
707 plates with 50 µg/ml ampicillin, and then incubated at 37°C for 24 hours followed by  
708 25°C for 24 hours. Worms at the L4 stage were washed onto the PA14-dsRed plates,  
709 incubated at 25°C for 16 hours, and then assayed with a COPAS Biosort machine  
710 (Union Biometrica) for the amount of red fluorescence inside each animal.

711

#### 712 *RNA-seq* sample preparation

713 Synchronized L1 stage worms were grown on 10 cm NGM plates seeded with OP50-1  
714 *E. coli* at 20°C until worms had reached the L4 stage. N2, *pals-22(jy3)*, and *pals-22(jy3)*

715 *pals-25(jy9)* strains were then shifted to 25°C for 4 hours before harvesting for RNA  
716 extraction. Bortezomib (or an equivalent amount of DMSO) was added to plates with L4  
717 stage N2 worms for a final concentration of 20uM; plates were then incubated at 20°C for  
718 4 hours before RNA isolation. RNA was isolated with TriReagent purification, followed by  
719 RNeasy column cleanup (Qiagen), as described [39]. RNA quality was assessed by  
720 TapeStation analysis at the Institute for Genomic Medicine (IGM) at UC San Diego.  
721 Paired-end sequencing libraries were then constructed with the TruSeq Stranded mRNA  
722 method (Illumina), followed by sequencing on HiSeq4000 machine (Illumina).

723

#### 724 *RNA-seq analysis*

725

726 Sequencing reads were aligned to WormBase release WS235 using Bowtie 2 [40], and  
727 transcript abundance was estimated using RSEM [41]. Differential expression analysis  
728 was performed in RStudio (v1.1.453) [42] using R (v3.5.0) [43] and Bioconductor (v3.7)  
729 [44] packages. As outlined in the RNAseq123 vignette [45], data was imported, filtered  
730 and normalized using edgeR [46], and linear modeling and differential expression  
731 analysis was performed using limma [47]. An FDR [48] cutoff of <0.01 was used to  
732 define differentially expressed genes; no fold-change criteria was used. Lists of  
733 upregulated genes used for comparisons were exported and further sanitized to remove  
734 dead genes and update WBGeneIDs to Wormbase release WS263.

735

#### 736 *Functional analysis*

737 Functional analysis was performed using Gene Set Enrichment Analysis (GSEA) v3.0  
738 software [49, 50]. Normalized RNA-seq expression data were converted into a GSEA-  
739 compatible filetype and ranked using the signal-to-noise metric with 1,000 permutations.  
740 Gene sets from other studies were converted to WBGeneIDs according to WormBase

741 release WS263. Independent analyses were performed for each of three comparisons:  
742 untreated *pals-22(jy3)* versus untreated N2 animals; untreated *pals-22(jy3)* versus  
743 untreated *pals-22(jy3) pals-25(jy9)* animals; bortezomib treated N2 versus DMSO vehicle  
744 control treated N2. Results were graphed based on their NES-value using GraphPad  
745 Prism 7 (GraphPad Software, La Jolla, CA).

746

#### 747 **Acknowledgments**

748 We acknowledge the IGM for RNAseq library construction and sequencing, Corrina  
749 Elder, Jessica Sowa, Ivana Sfaric, and Michael K. Fasseas for technical support, and  
750 Vladimir Lazetic, Robert Luallen, Johan Panek, Ivana Sfaric, Eillen Tecle, Samira Yitiz  
751 and Elina Zuniga for comments on the manuscript.

752

753

754

755

#### 756 **References**

757

- 758 1. Pearson JC, Lemons D, McGinnis W. Modulating Hox gene functions during  
759 animal body patterning. *Nature Reviews Genetics*. 2005;6(12):893.
- 760 2. Ross BD, Rosin L, Thomae AW, Hiatt MA, Vermaak D, de la Cruz AFA, et al.  
761 Stepwise evolution of essential centromere function in a *Drosophila* neogene.  
762 *Science*. 2013;340(6137):1211-4.
- 763 3. Joshi RK, Nayak S. Perspectives of genomic diversification and molecular  
764 recombination towards R-gene evolution in plants. *Physiology and Molecular*  
765 *Biology of Plants*. 2013;19(1):1-9.
- 766 4. von Moltke J, Ayres JS, Kofoed EM, Chavarría-Smith J, Vance RE. Recognition  
767 of bacteria by inflammasomes. *Annual review of immunology*. 2013;31:73-106.
- 768 5. Li X, Kapos P, Zhang Y. NLRs in plants. *Current opinion in immunology*.  
769 2015;32:114-21.

- 770 6. Reddy KC, Dror T, Sowa JN, Panek J, Chen K, Lim ES, et al. An intracellular  
771 pathogen response pathway promotes proteostasis in *C. elegans*. *Current Biology*.  
772 2017;27(22):3544-53. e5.
- 773 7. Hentati A, Bejaoui K, Pericak-Vance MA, Hentati F, Speer MC, Hung W-Y, et al.  
774 Linkage of recessive familial amyotrophic lateral sclerosis to chromosome 2q33-  
775 q35. *Nature genetics*. 1994;7(3):425.
- 776 8. Leyva-Díaz E, Stefanakis N, Carrera I, Glenwinkel L, Wang G, Driscoll M, et al.  
777 Silencing of repetitive DNA is controlled by a member of an unusual *Caenorhabditis*  
778 *elegans* gene family. *Genetics*. 2017;207(2):529-45.
- 779 9. Bakowski MA, Desjardins CA, Smelkinson MG, Dunbar TA, Lopez-Moyado IF,  
780 Rifkin SA, et al. Ubiquitin-mediated response to microsporidia and virus infection in  
781 *C. elegans*. *PLoS pathogens*. 2014;10(6):e1004200.
- 782 10. Zuryn S, Jarriault S, editors. Deep sequencing strategies for mapping and  
783 identifying mutations from genetic screens. *Worm*; 2013: Taylor & Francis.
- 784 11. Sarov M, Murray JI, Schanze K, Pozniakovski A, Niu W, Angermann K, et al. A  
785 genome-scale resource for in vivo tag-based protein function exploration in *C.*  
786 *elegans*. *Cell*. 2012;150(4):855-66.
- 787 12. Troemel ER, Félix M-A, Whiteman NK, Barrière A, Ausubel FM. Microsporidia  
788 are natural intracellular parasites of the nematode *Caenorhabditis elegans*. *PLoS*  
789 *biology*. 2008;6(12):e309.
- 790 13. Raizen DM, Lee R, Avery L. Interacting genes required for pharyngeal  
791 excitation by motor neuron MC in *Caenorhabditis elegans*. *Genetics*.  
792 1995;141(4):1365-82.
- 793 14. Félix M-A, Ashe A, Piffaretti J, Wu G, Nuez I, BÉlicard T, et al. Natural and  
794 experimental infection of *Caenorhabditis* nematodes by novel viruses related to  
795 nodaviruses. *PLoS biology*. 2011;9(1):e1000586.
- 796 15. Kim D, Ewbank J. Signaling in the Immune Response. 2015 Dec 22.  
797 *WormBook* [Internet] <http://www.wormbook.org.1-51>.
- 798 16. Oliveira RP, Abate JP, Dilks K, Landis J, Ashraf J, Murphy CT, et al. Condition -  
799 adapted stress and longevity gene regulation by *Caenorhabditis elegans* SKN -  
800 1/Nrf. *Aging cell*. 2009;8(5):524-41.
- 801 17. Li J, Chauve L, Phelps G, Briemann RM, Morimoto RI. E2F coregulates an  
802 essential HSF developmental program that is distinct from the heat-shock response.  
803 *Genes Dev*. 2016;30(18):2062-75. Epub 2016/11/01. doi: 10.1101/gad.283317.116.  
804 PubMed PMID: 27688402; PubMed Central PMCID: PMC5066613.
- 805 18. Irazoqui JE, Troemel ER, Feinbaum RL, Luhachack LG, Cezairliyan BO,  
806 Ausubel FM. Distinct pathogenesis and host responses during infection of *C. elegans*  
807 by *P. aeruginosa* and *S. aureus*. *PLoS pathogens*. 2010;6(7):e1000982.
- 808 19. Osman GA, Fasseas MK, Koneru SL, Essmann CL, Kyrou K, Srinivasan MA, et  
809 al. Natural infection of *C. elegans* by an oomycete reveals a new pathogen-specific  
810 immune response. *Current Biology*. 2018;28(4):640-8. e5.
- 811 20. Shaye DD, Greenwald I. OrthoList: a compendium of *C. elegans* genes with  
812 human orthologs. *PloS one*. 2011;6(5):e20085.
- 813 21. Ning Y, Liu W, Wang G-L. Balancing Immunity and Yield in Crop Plants.  
814 *Trends in plant science*. 2017.



- 815 22. Schulenburg H, Félix M-A. The natural biotic environment of *Caenorhabditis*  
816 *elegans*. *Genetics*. 2017;206(1):55-86.
- 817 23. Zhang G, Sachse M, Prevost M-C, Luallen RJ, Troemel ER, Félix M-A. A large  
818 collection of novel nematode-infecting microsporidia and their diverse interactions  
819 with *Caenorhabditis elegans* and other related nematodes. *PLoS pathogens*.  
820 2016;12(12):e1006093.
- 821 24. Le Roux C, Huet G, Jauneau A, Camborde L, Trémousaygue D, Kraut A, et al. A  
822 receptor pair with an integrated decoy converts pathogen disabling of transcription  
823 factors to immunity. *Cell*. 2015;161(5):1074-88.
- 824 25. Sarris PF, Duxbury Z, Huh SU, Ma Y, Segonzac C, Sklenar J, et al. A plant  
825 immune receptor detects pathogen effectors that target WRKY transcription factors.  
826 *Cell*. 2015;161(5):1089-100.
- 827 26. Cohen LB, Troemel ER. Microbial pathogenesis and host defense in the  
828 nematode *C. elegans*. *Current opinion in microbiology*. 2015;23:94-101.
- 829 27. Dunbar TL, Yan Z, Balla KM, Smelkinson MG, Troemel ER. *C. elegans* detects  
830 pathogen-induced translational inhibition to activate immune signaling. *Cell host &*  
831 *microbe*. 2012;11(4):375-86.
- 832 28. McEwan DL, Kirienko NV, Ausubel FM. Host translational inhibition by  
833 *Pseudomonas aeruginosa* Exotoxin A Triggers an immune response in  
834 *Caenorhabditis elegans*. *Cell host & microbe*. 2012;11(4):364-74.
- 835 29. Zugasti O, Bose N, Squiban B, Belougne J, Kurz CL, Schroeder FC, et al.  
836 Activation of a G protein-coupled receptor by its endogenous ligand triggers the  
837 *Caenorhabditis elegans* innate immune response. *Nature immunology*.  
838 2014;15(9):833.
- 839 30. Irazoqui JE, Urbach JM, Ausubel FM. Evolution of host innate defence:  
840 insights from *Caenorhabditis elegans* and primitive invertebrates. *Nature Reviews*  
841 *Immunology*. 2010;10(1):47.
- 842 31. Maltez VI, Miao EA. Reassessing the evolutionary importance of  
843 inflammasomes. *The Journal of Immunology*. 2016;196(3):956-62.
- 844 32. Shum EY, Jones SH, Shao A, Dumdie J, Krause MD, Chan W-K, et al. The  
845 antagonistic gene paralogs *Upf3a* and *Upf3b* govern nonsense-mediated RNA decay.  
846 *Cell*. 2016;165(2):382-95.
- 847 33. Brenner S. The genetics of *Caenorhabditis elegans*. *Genetics*. 1974;77(1):71-  
848 94.
- 849 34. Kutscher LM, Shaham S. Forward and reverse mutagenesis in *C. elegans*.  
850 *WormBook: the online review of C elegans biology*. 2014:1.
- 851 35. Minevich G, Park DS, Blankenberg D, Poole RJ, Hobert O. CloudMap: a cloud-  
852 based pipeline for analysis of mutant genome sequences. *Genetics*.  
853 2012;192(4):1249-69.
- 854 36. Pfaffl MW. A new mathematical model for relative quantification in real-time  
855 RT-PCR. *Nucleic acids research*. 2001;29(9):e45-e.
- 856 37. Balla KM, Andersen EC, Kruglyak L, Troemel ER. A wild *C. elegans* strain has  
857 enhanced epithelial immunity to a natural microsporidian parasite. *PLoS pathogens*.  
858 2015;11(2):e1004583.

- 859 38. Djonović S, Urbach JM, Drenkard E, Bush J, Feinbaum R, Ausubel JL, et al.  
860 Trehalose biosynthesis promotes *Pseudomonas aeruginosa* pathogenicity in plants.  
861 PLoS pathogens. 2013;9(3):e1003217.
- 862 39. Troemel ER, Chu SW, Reinke V, Lee SS, Ausubel FM, Kim DH. p38 MAPK  
863 regulates expression of immune response genes and contributes to longevity in *C.*  
864 *elegans*. PLoS genetics. 2006;2(11):e183.
- 865 40. Langmead B, Salzberg SL. Fast gapped-read alignment with Bowtie 2. Nature  
866 methods. 2012;9(4):357.
- 867 41. Li B, Dewey CN. RSEM: accurate transcript quantification from RNA-Seq data  
868 with or without a reference genome. BMC bioinformatics. 2011;12(1):323.
- 869 42. Team R. RStudio: integrated development for R. RStudio, Inc, Boston, MA URL  
870 <http://www.rstudio.com>. 2015.
- 871 43. Team RC. R: A language and environment for statistical computing. 2013.
- 872 44. Gentleman RC, Carey VJ, Bates DM, Bolstad B, Dettling M, Dudoit S, et al.  
873 Bioconductor: open software development for computational biology and  
874 bioinformatics. Genome biology. 2004;5(10):R80.
- 875 45. Law CW, Alhamdoosh M, Su S, Smyth GK, Ritchie ME. RNA-seq analysis is  
876 easy as 1-2-3 with limma, Glimma and edgeR. F1000Research. 2016;5.
- 877 46. Robinson MD, McCarthy DJ, Smyth GK. edgeR: a Bioconductor package for  
878 differential expression analysis of digital gene expression data. Bioinformatics.  
879 2010;26(1):139-40.
- 880 47. Ritchie ME, Phipson B, Wu D, Hu Y, Law CW, Shi W, et al. limma powers  
881 differential expression analyses for RNA-sequencing and microarray studies.  
882 Nucleic acids research. 2015;43(7):e47-e.
- 883 48. Storey JD, Tibshirani R. Statistical significance for genomewide studies.  
884 Proceedings of the National Academy of Sciences. 2003;100(16):9440-5.
- 885 49. Mootha VK, Lindgren CM, Eriksson K-F, Subramanian A, Sihag S, Lehar J, et al.  
886 PGC-1 $\alpha$ -responsive genes involved in oxidative phosphorylation are coordinately  
887 downregulated in human diabetes. Nature genetics. 2003;34(3):267.
- 888 50. Subramanian A, Tamayo P, Mootha VK, Mukherjee S, Ebert BL, Gillette MA, et  
889 al. Gene set enrichment analysis: a knowledge-based approach for interpreting  
890 genome-wide expression profiles. Proceedings of the National Academy of Sciences.  
891 2005;102(43):15545-50.

892

893

## 894 **Supporting information**

895

### 896 **S1 Table. Lists of strains and mutations.**

897

898 **S2 Figure. *pals-25* RNAi suppresses increased *pals-5p::GFP* expression in *pals-22***  
899 **mutants and PALS-25::GFP is expressed broadly.**

900 (A) Wild-type or *pals-22* mutant animals carrying the *pals-5p::GFP* transgene, treated  
901 with either L4440 RNAi control or *pals-25* RNAi. Green is *pals-5p::GFP*, red is *myo-*  
902 *2p::mCherry* expression in the pharynx as a marker for presence of the transgene.  
903 Images are overlays of green, red, and Nomarski channels and were taken with the  
904 same camera exposure for all. Scale bar, 100  $\mu$ m. (B,C) Confocal fluorescence images  
905 of adult animals carrying a fosmid transgene expressing PALS-25::GFP from the  
906 endogenous promoter. Animals were treated with either (B) L4440 RNAi control or (C)  
907 *pals-22* RNAi. Scale bar, 50  $\mu$ m.

908

909 **S3 Figure. *pals-25* mutation suppresses the lifespan and thermotolerance**  
910 **phenotypes of *pals-22* mutants.**

911 (A,B) Lifespan of wild type, *pals-22(jy3)*, and *pals-22(jy3) pals-25(jy9)* animals. Assays  
912 were performed with 40 animals per plate, and three plates per strain per experiment. p-  
913 value for *pals-22(jy3)* compared to *pals-22(jy3) pals-25(jy9)* is <0.0001 using the Log-  
914 rank test. (C,D) Survival of animals after 2 hour heat shock treatment at 37°C followed  
915 by 24 hours at 20°C. Strains were tested in triplicate, with at least 30 animals per plate.  
916 Mean fraction alive indicates the average survival among the triplicates, errors bars are  
917 SD. \*\* p < 0.01, \* p < 0.05.

918

919 **S4 Figure. Mutation of *pals-22* or *pals-25* does not affect feeding rates of animals**  
920 **in pathogen infection assays.**

921 (A,B) Quantification of fluorescent bead accumulation in wild-type, *pals-22*, *pals-22 pals-*  
922 *25*, and *eat-2* mutant animals. Beads were mixed with OP50-1 bacteria and either (A) *N.*

923 *parisii* spores or (B) Orsay virus and fed to worms as in infection assays. Worms were  
924 fixed in paraformaldehyde after 30 minutes of feeding, and fluorescence of accumulated  
925 beads in each animal was measured using a COPAS Biosort machine to measure the  
926 mean red signal and length of individual animals, indicated by red dots. Mean signal of  
927 the population is indicated by black bars, with error bars as SD. Graph is a compilation of  
928 three independent replicates, with at least 100 animals analyzed in each replicate.  
929 Statistical analysis was performed using one-way ANOVA. \*\*\*  $p < 0.001$ , ns, not  
930 significant.

931

932 **S5 Table. RNA-seq statistics.**

933

934 **S6 Table. FPKM values for all genes in data set.**

935

936 **S7 Table. Differentially expressed genes, as determined by edgeR and limma.**

937

938 **S8 Table. Gene sets used for GSEA and their sources.**

939

940 **S9 Table. Detailed GSEA results.**

941

942 **S10 Table. Gene set overlaps.**

943

944 **S11 Table. Human orthology analysis.**

945

946 **S12 Figure. Induction of *chil-27p::GFP* expression seen after *pals-22* RNAi  
947 treatment.**

948 Shown are animals treated with either L4440 RNAi control, *pals-22* RNAi, or *M. humicola*  
949 infection. The *col-12p::mCherry* transgene is constitutively expressed in the epidermis.  
950 Scale bar, 100  $\mu$ m.  
951

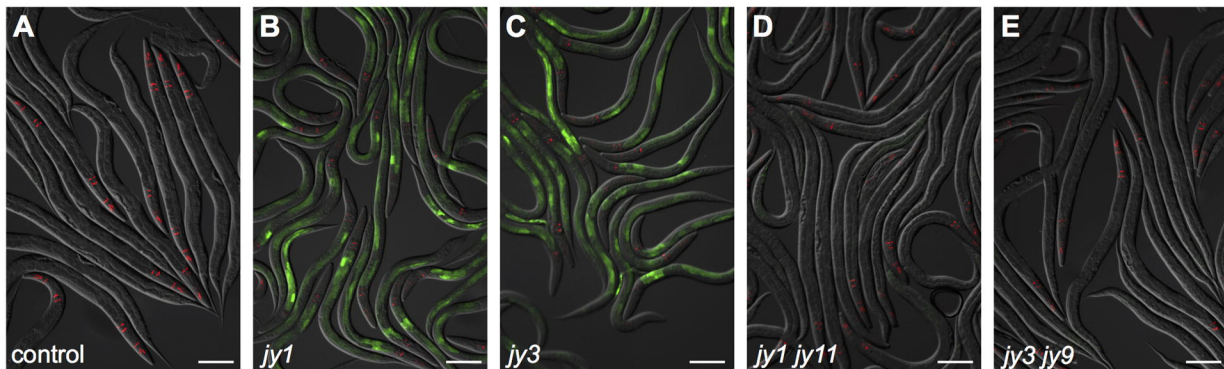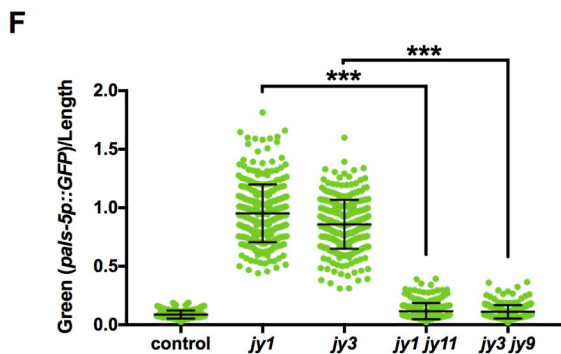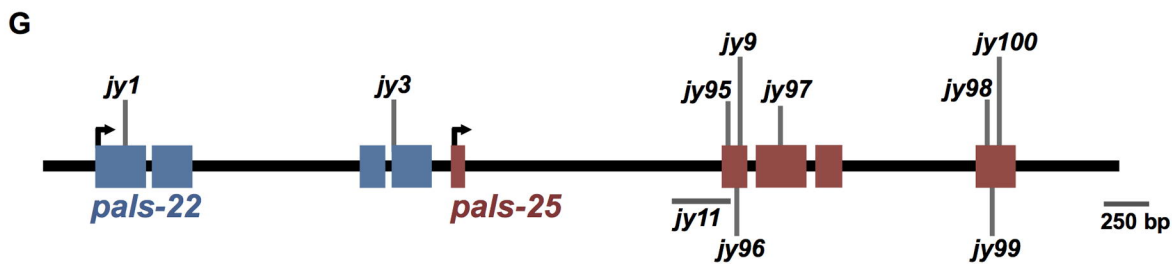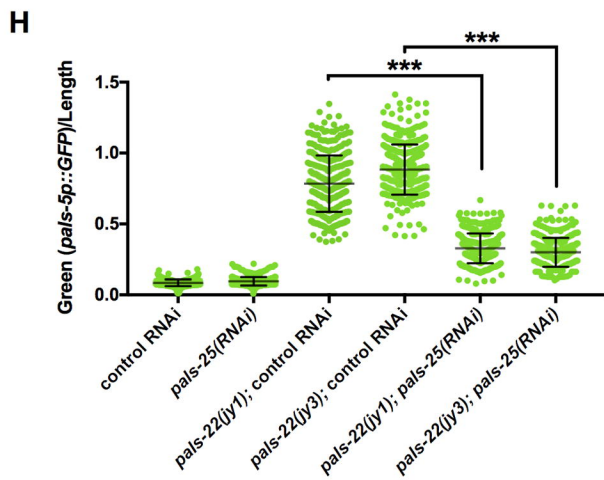

A

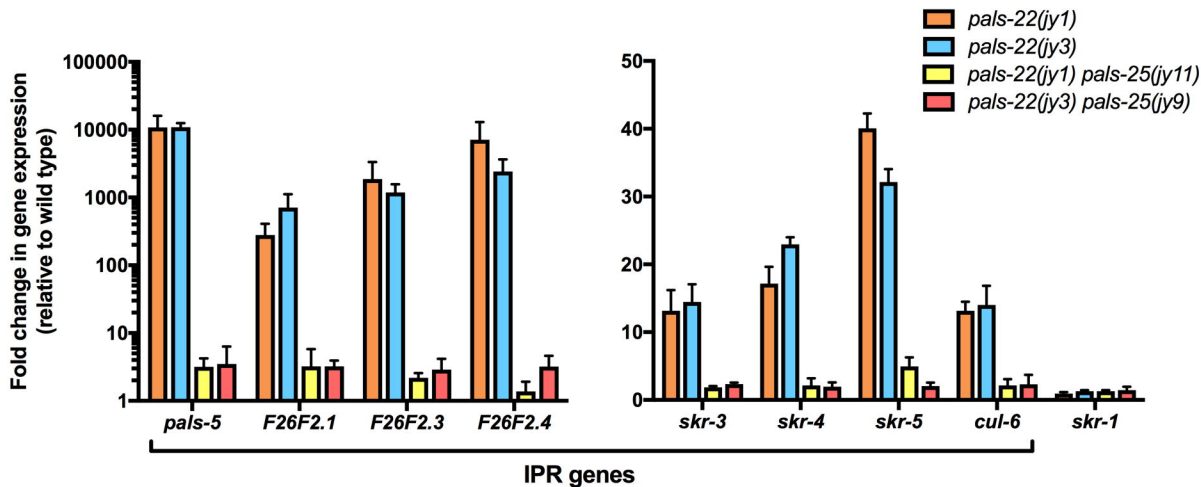

B

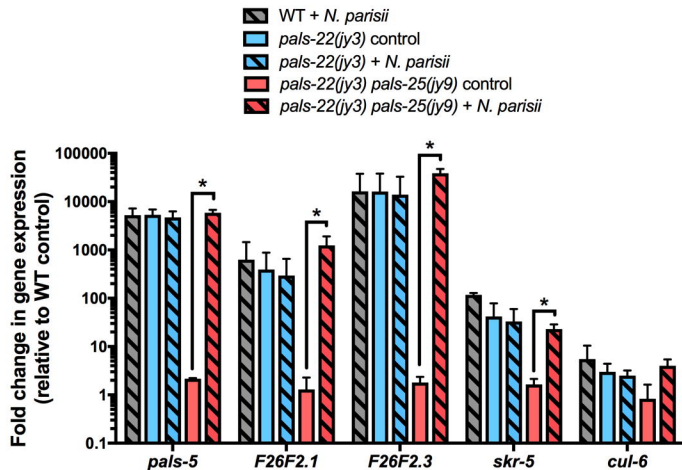

C

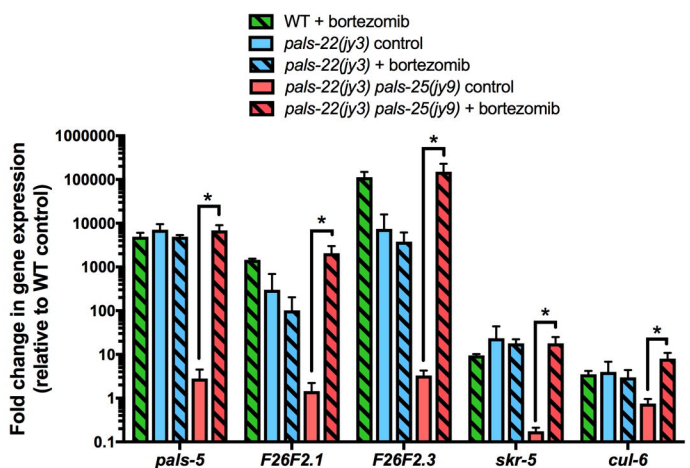

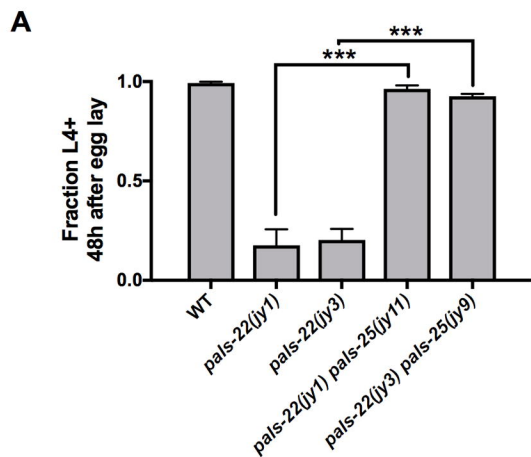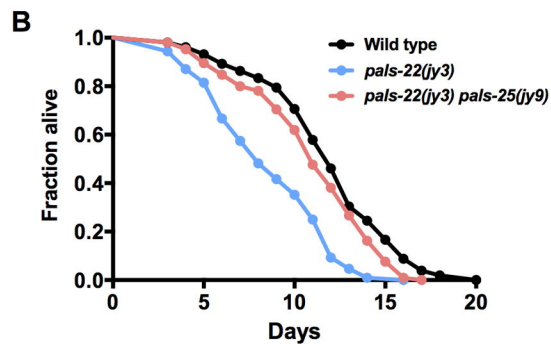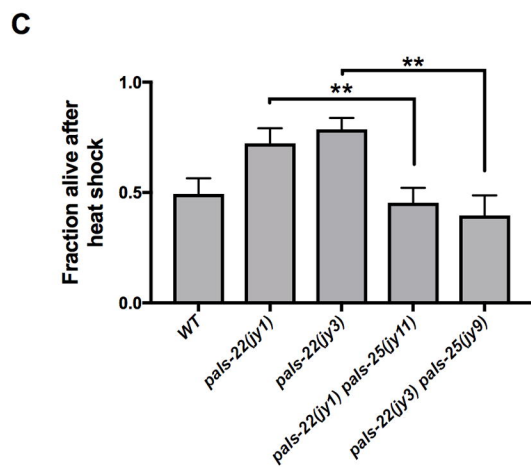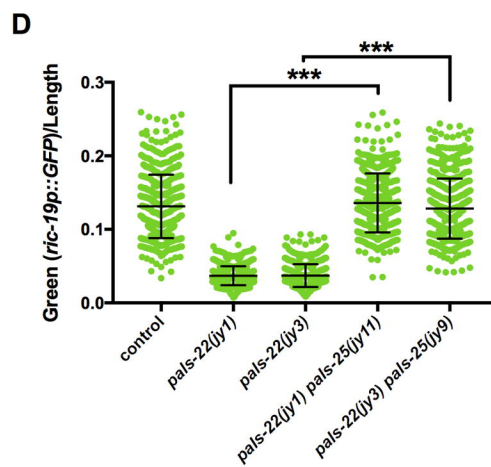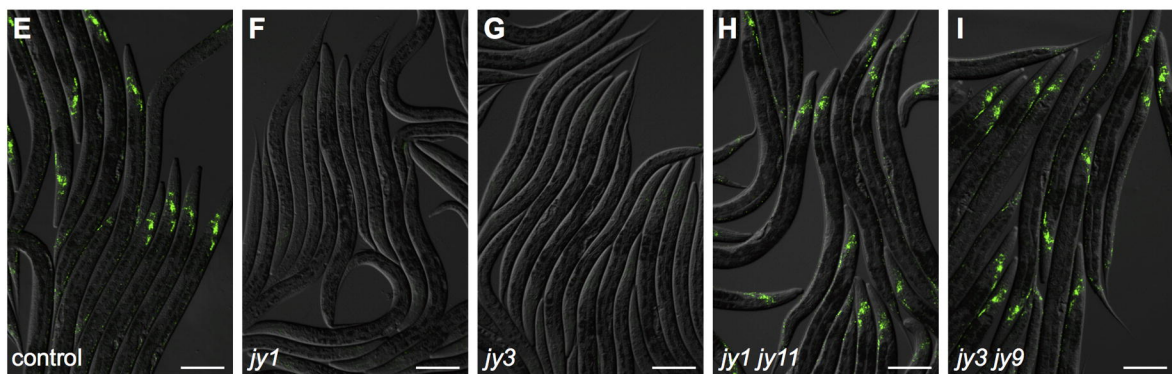



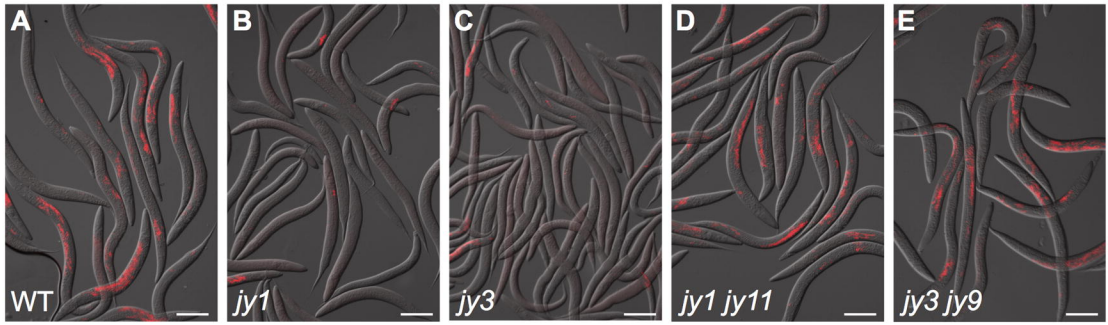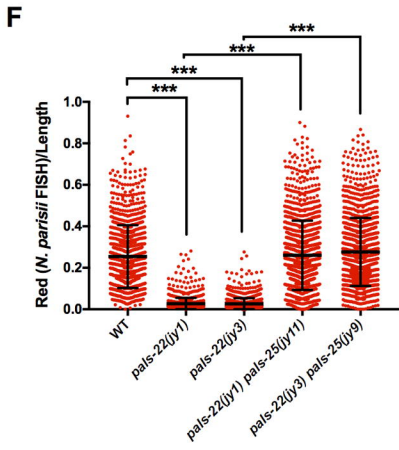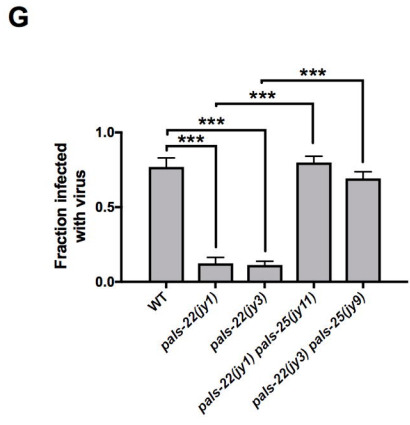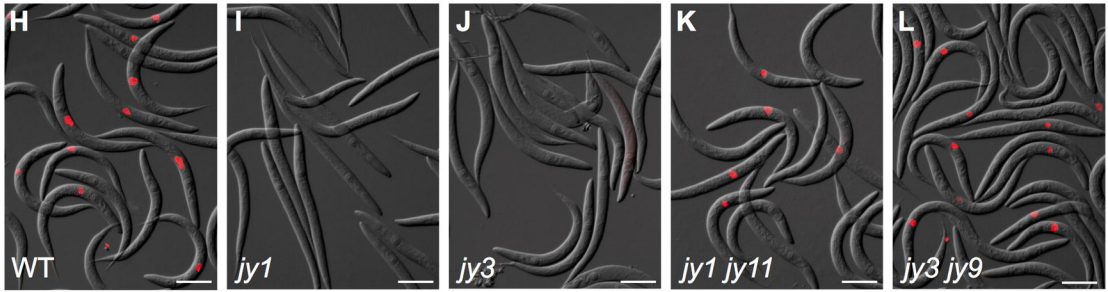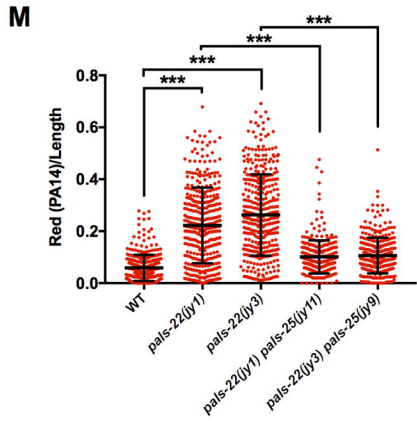

**A** *pals-22* vs. wt (2,756 genes) *pals-22* vs. *pals-22 pals-25* (744 genes)

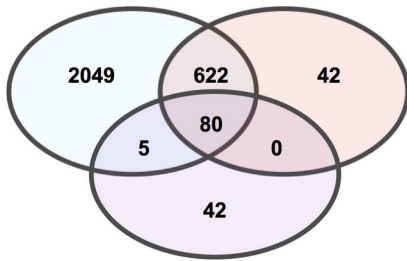

*N. parisi* induced genes (127 genes)

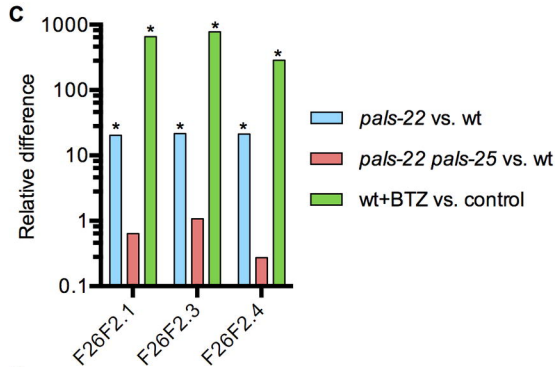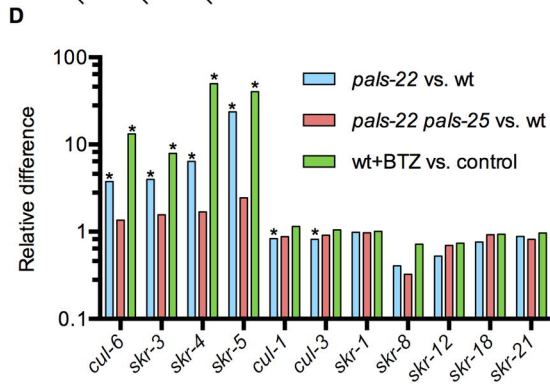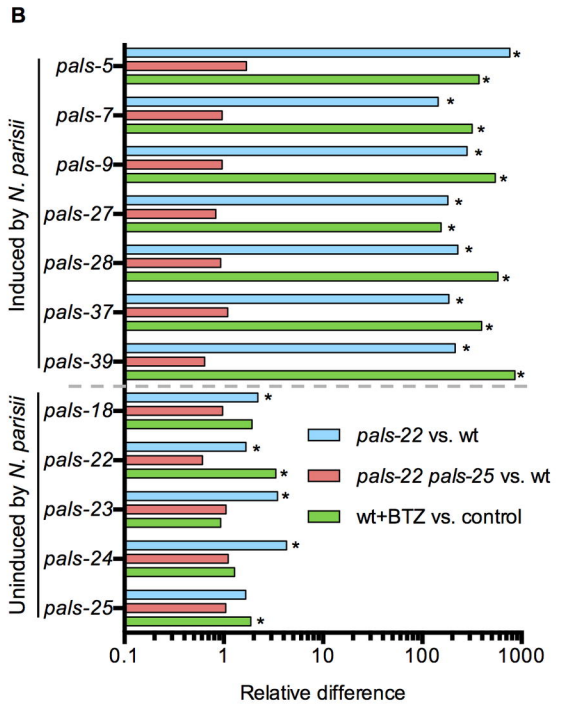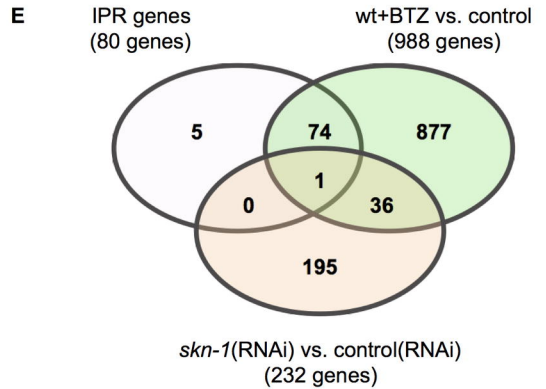

| <i>pals-22</i> vs. wt | <i>pals-22</i> vs. <i>pals-25</i> | wt+BTZ vs. control | Gene expression pattern       | Category                 |
|-----------------------|-----------------------------------|--------------------|-------------------------------|--------------------------|
| *                     | *                                 | *                  | UP <i>N. parisii</i> 8hpi     | Intracellular pathogens  |
| *                     | *                                 | *                  | UP <i>N. parisii</i> 16hpi    |                          |
| *                     | *                                 | *                  | UP <i>N. parisii</i> 30hpi    |                          |
| *                     | *                                 | *                  | UP <i>N. parisii</i> 40hpi    |                          |
| *                     | *                                 | *                  | UP <i>N. parisii</i> 12hpi    |                          |
| *                     | *                                 | *                  | UP Orsay virus 12hpi          |                          |
| *                     | *                                 | *                  | UP Orsay virus 4dpi           | Natural pathogens        |
| *                     | *                                 | *                  | UP <i>M. humicola</i> 12hpi   |                          |
| *                     | *                                 | *                  | UP <i>M. humicola</i> 24hpi   |                          |
|                       |                                   | *                  | UP <i>D. conispora</i> 12hpi  | Other pathogens          |
|                       |                                   | *                  | UP <i>P. aeruginosa</i> 12hpi |                          |
|                       |                                   | *                  | UP <i>E. faecalis</i> 24hpi   |                          |
|                       |                                   | *                  | UP <i>S. aureus</i> 8hpi      | Temperature response     |
|                       | *                                 | *                  | UP heat-shock 24h             |                          |
|                       | *                                 | *                  | DOWN heat-shock 24h           |                          |
|                       | *                                 | *                  | UP cold-warming 2h            |                          |
|                       | *                                 | *                  | DOWN cold-warming 2h          |                          |
|                       | *                                 | *                  | UP Cry5B 3h                   |                          |
|                       |                                   | *                  | UP Cadmium 3h                 | Stress response          |
|                       |                                   | *                  | UP RPW-24 16h                 |                          |
|                       | *                                 | *                  | UP <i>hsf-1</i>               | Gene activity depletions |
|                       | *                                 | *                  | UP <i>pmk-1</i>               |                          |
|                       | *                                 | *                  | UP <i>daf-16</i>              |                          |

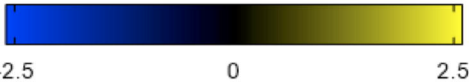

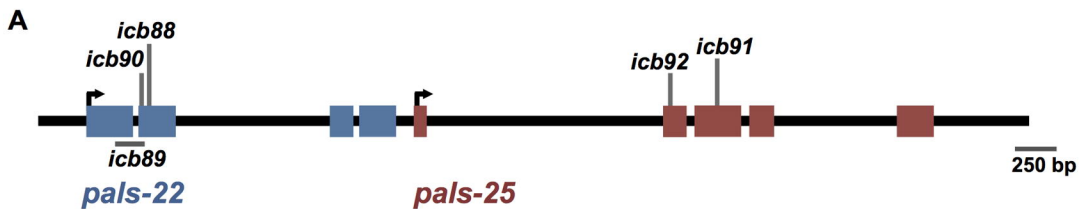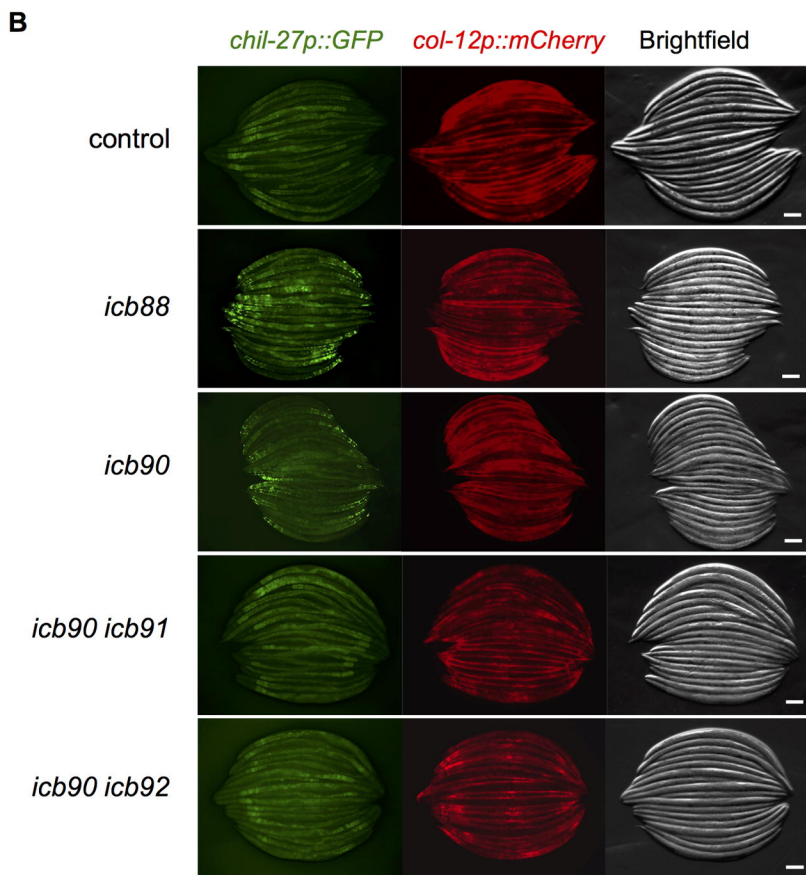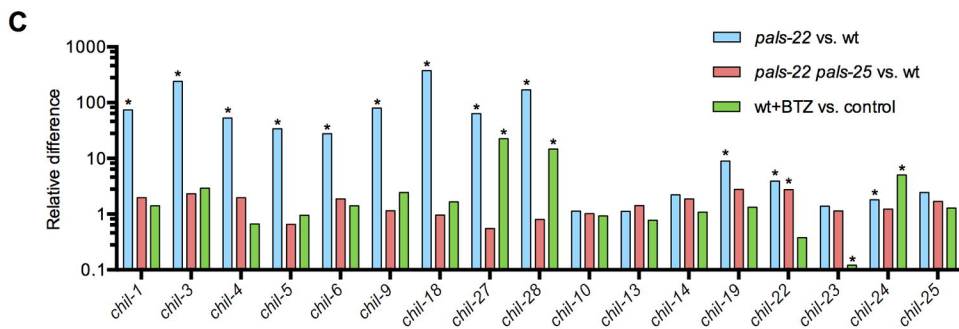

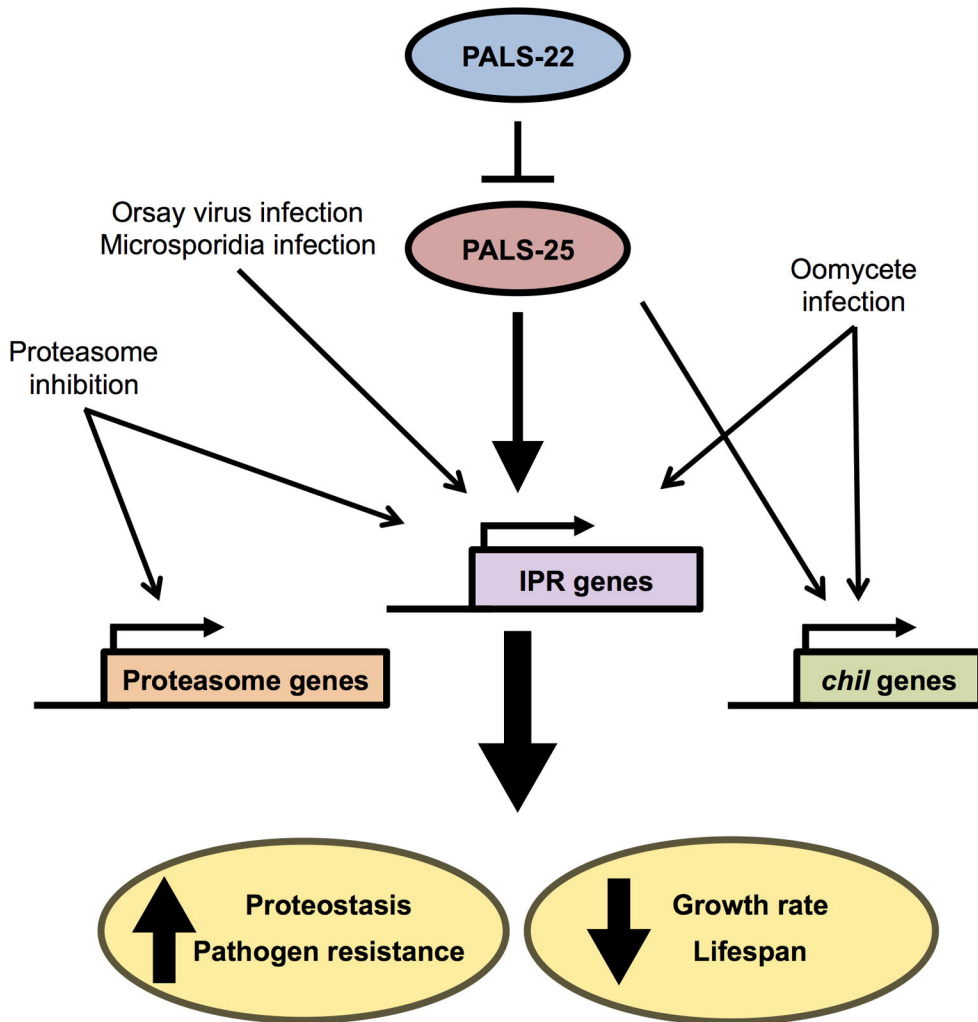

Source: http://biorxiv.org/content/10.1101/357756v1.full.pdf
